# Supplementary material
Source: Springer Nature journal article supplement (https://www.springermedizin.de/resource/supplementary/12931_2011_1135_MOESM4_ESM.pdf/9425412)

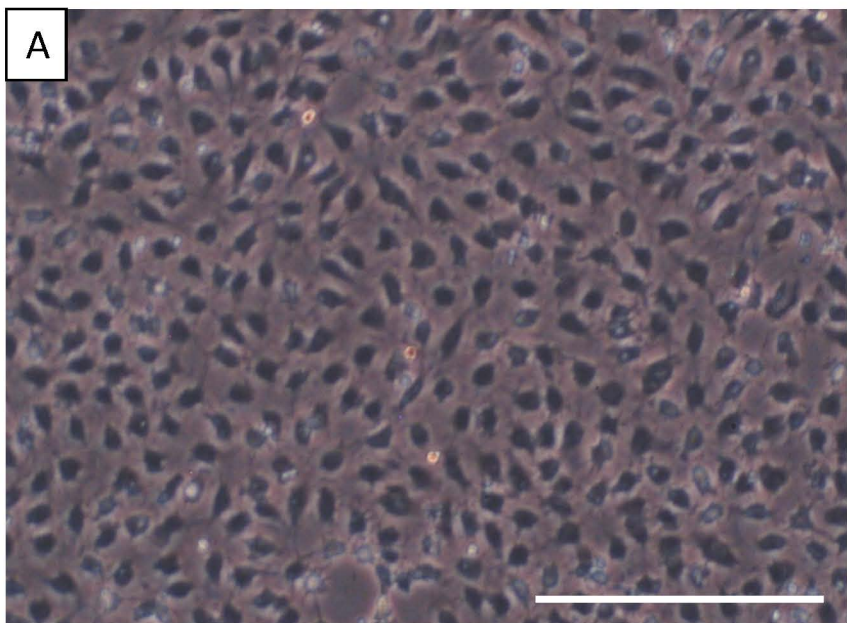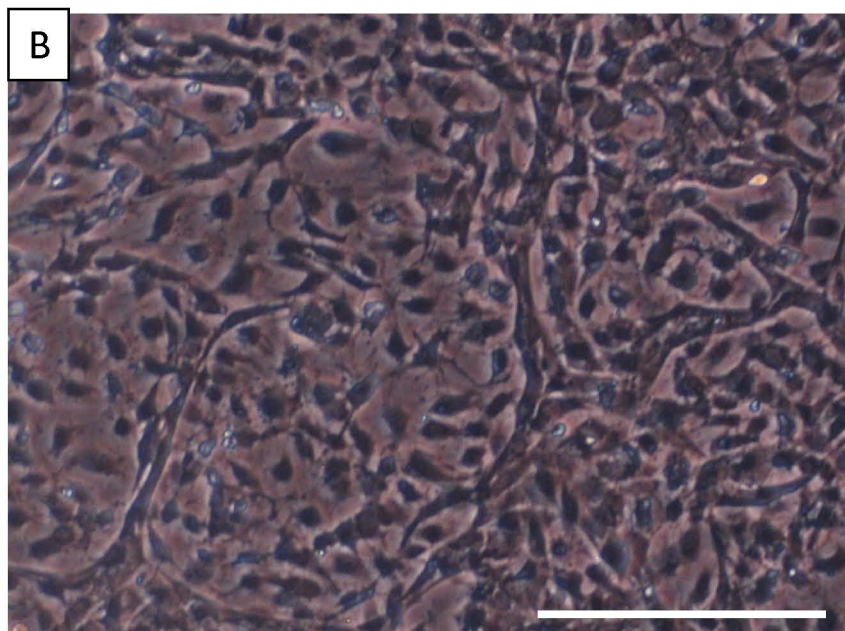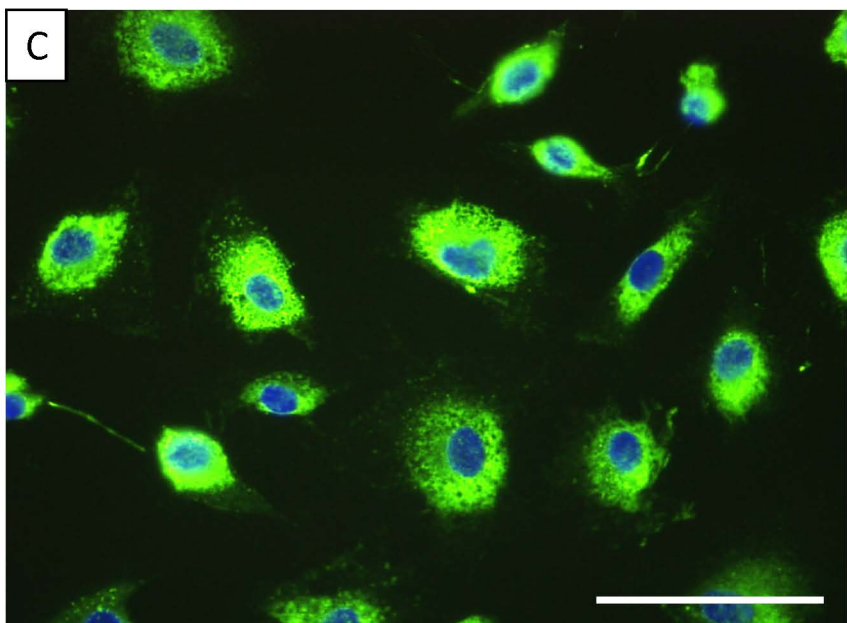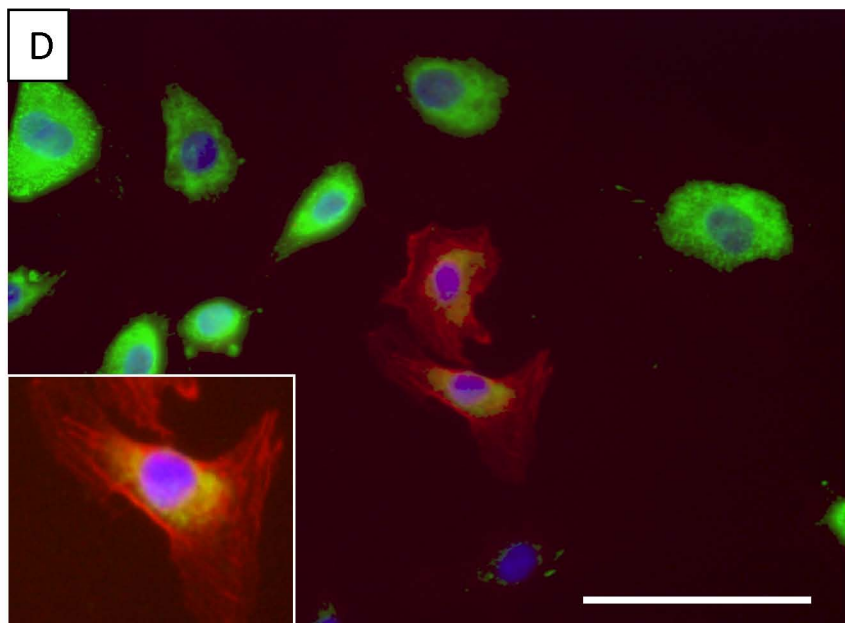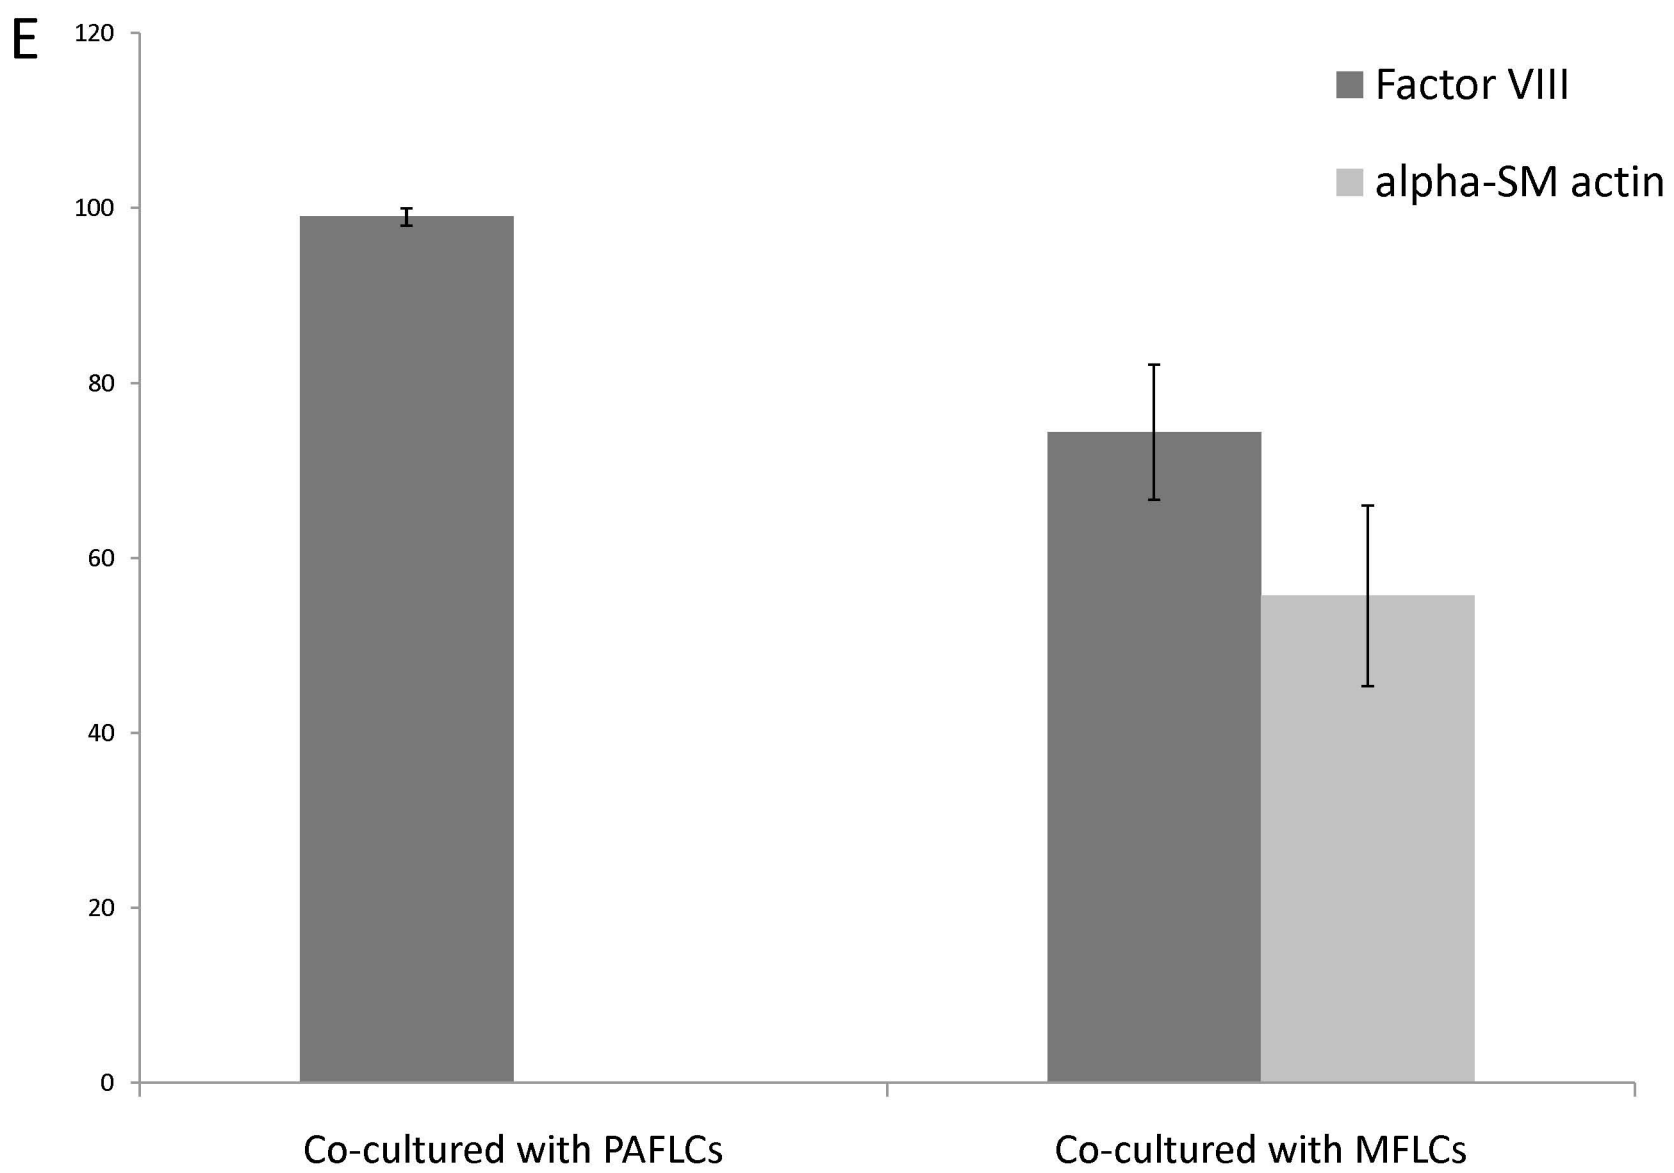

$p < 0.05$  Co-cultured EC with PAFLCs vs Co-cultured EC with MFLCs

Supplement: MOESM4 [file 9425412]
